# Supplementary material for: Biology, ecology, and biogeography of eremic praying mantis Blepharopsis mendica (Insecta: Mantodea)
Source: PeerJ journal article supplement (doi:10.7717/peerj.16814), 2024-01-29

**Supplementary material Figure S2: Phylogenetic analyses of COI sequences.**

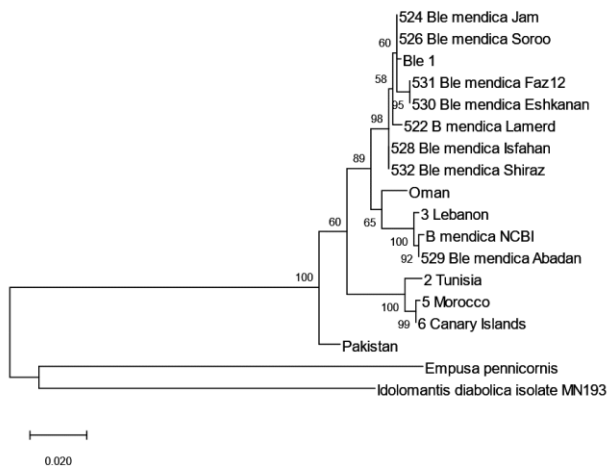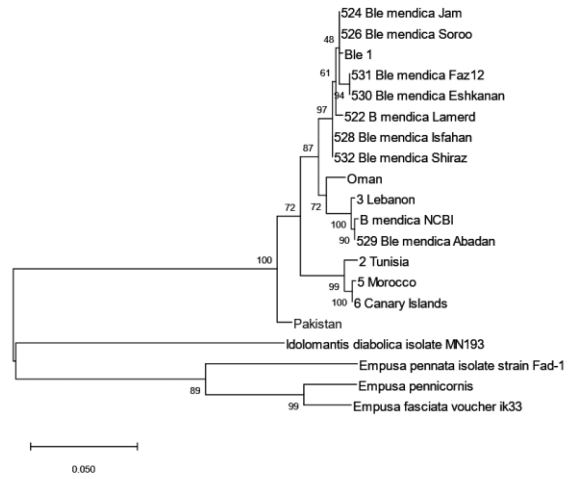

Supplement: Figure_S2.pdf [file Figure_S2.pdf]
