# Supplementary material for: Biology, ecology, and biogeography of eremic praying mantis Blepharopsis mendica (Insecta: Mantodea)
Source: PeerJ journal article supplement (doi:10.7717/peerj.16814), 2024-01-29

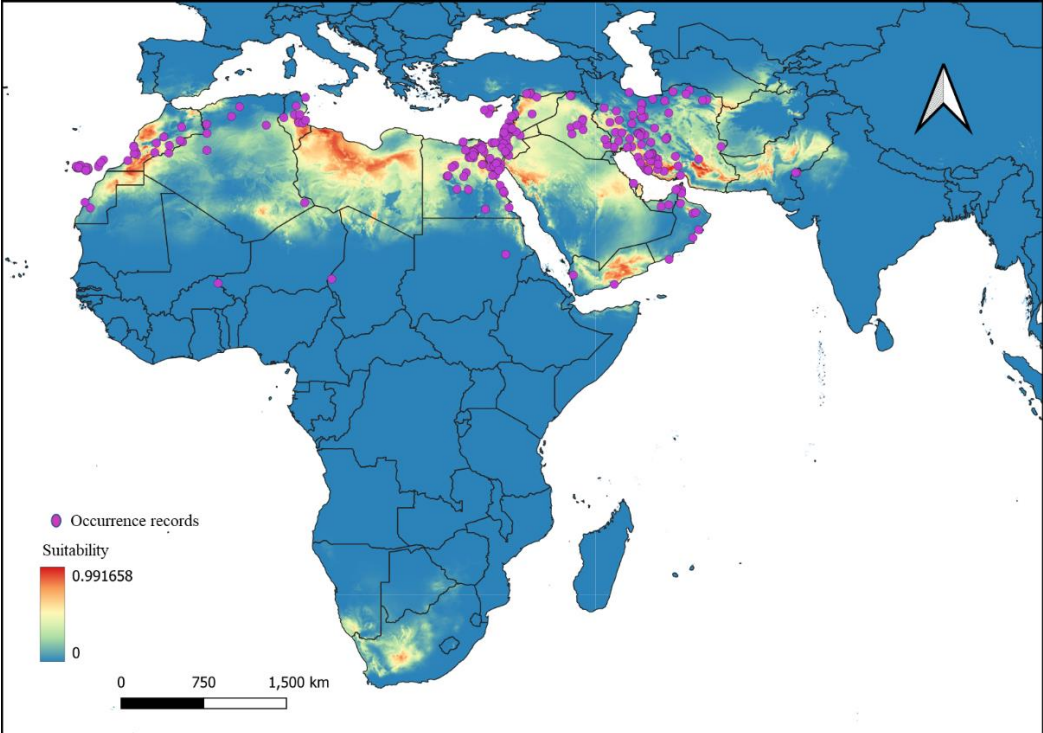

Supplement: S1.pdf [file S1.pdf]
